# Supplementary material for: Designed multi-layer buffer for high-performance semitransparent wide-bandgap perovskite solar cells
Source: Royal Society of Chemistry journal article supplement (doi:10.1039/d2ma01089e), 2023-01-01
Supplement: d2ma01089e1.pdf [file d2ma01089e1.pdf]

## Supporting Information

### **Designed Multi-Layer Buffer for High-Performance Semitransparent Wide-Bandgap Perovskite Solar Cells**

Junjie Lou,<sup>ab</sup> Jiangshan Feng,<sup>\*a</sup> Yang Cao,<sup>a</sup> Yucheng Liu,<sup>a</sup> Yong Qin,<sup>\*b</sup> and  
Shengzhong (Frank) Liu<sup>\*acd</sup>

<sup>a</sup> *Laboratory of Applied Surface and Colloid Chemistry, Ministry of Education; School of Materials Science and Engineering; Shaanxi Key Laboratory for Advanced Energy Devices; Shaanxi Engineering Lab for Advanced Energy Technology; Institute for Advanced Energy Materials, Shaanxi Normal University, Xi'an 710119, Shaanxi, China.*

*Email: fengjs@snnu.edu.cn*

<sup>b</sup> *Institute of Nanoscience and Nanotechnology, School of Materials and Energy, Lanzhou University, Lanzhou, Gansu 730000, China. Email: qinyong@lzu.edu.cn*

<sup>c</sup> *Dalian National Laboratory for Clean Energy, iChEM, Dalian Institute of Chemical Physics, Chinese Academy of Sciences, 457 Zhongshan Road, Dalian 116023, China. Email: szliu@dicp.ac.cn*

<sup>d</sup> *University of Chinese Academy of Sciences, Beijing 100049, China.*

\*Corresponding author.

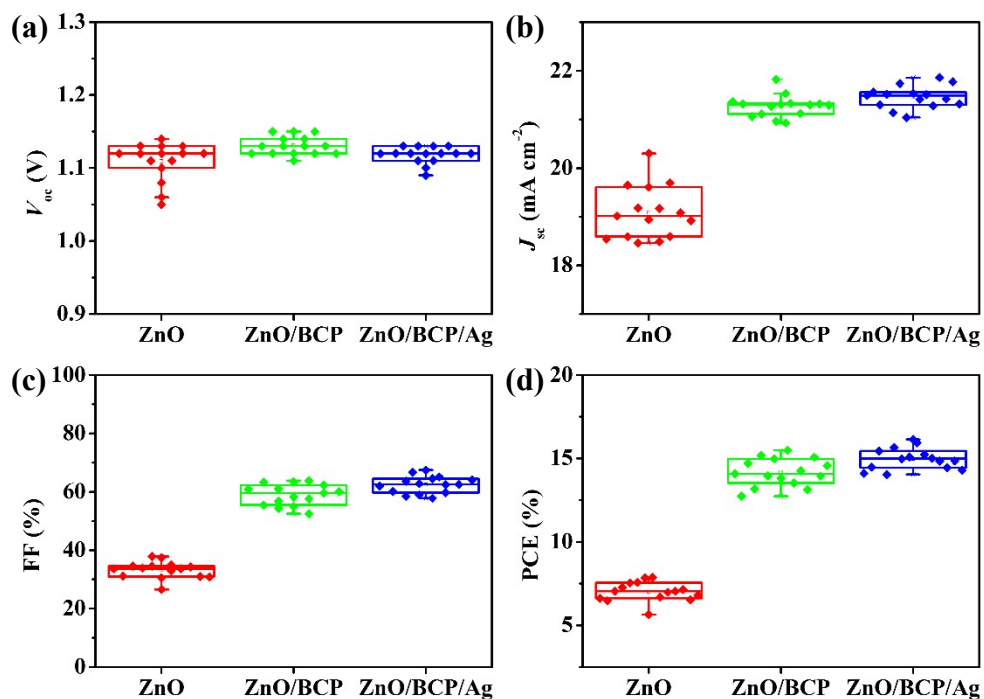

Figure S1. Statistical photovoltaic parameters of ST-PSCs based on different buffers: ZnO, ZnO/BCP or ZnO/BCP/Ag. The data were collected from 15 cells for each kind of ST-PSCs.

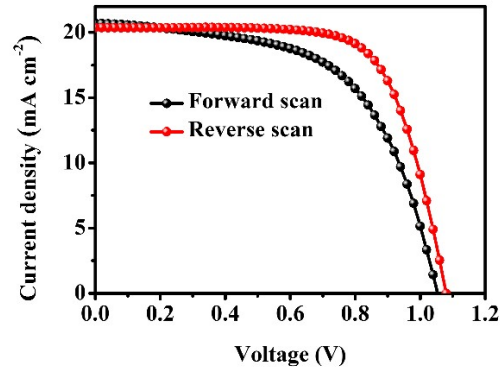

Figure S2. Forward ( $V_{oc}=1.05$  V,  $J_{sc}=20.71$  mA cm<sup>-2</sup>, FF= 58.10%, PCE=12.68%) and reverse ( $V_{oc}=1.08$  V,  $J_{sc}=20.36$  mA cm<sup>-2</sup>, FF= 70.21%, PCE=15.44%) direction scanned  $J$ - $V$  curves for ST-PSCs with effective area of 1 cm<sup>2</sup>.

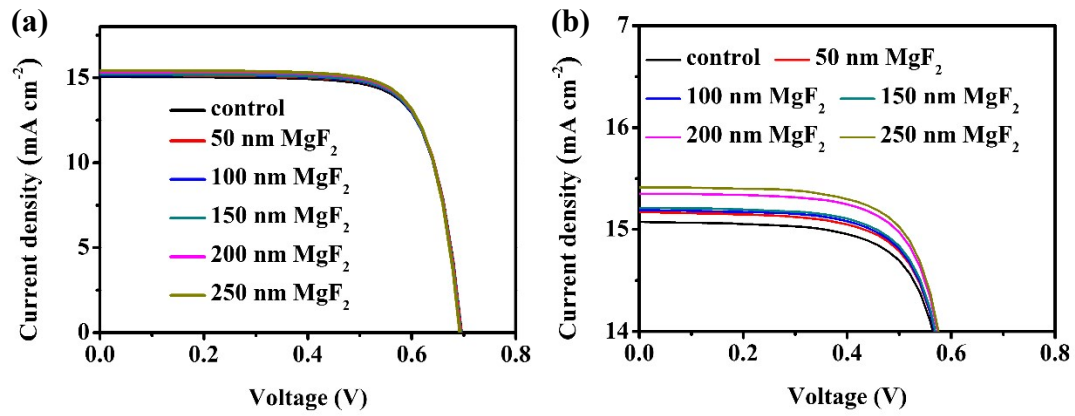

Figure S3. (a, b)  $J$ - $V$  curves and their partial enlarged drawing of filtered silicon cell with different thickness of  $\text{MgF}_2$  on TCO side of filter.

Table 1. Summary of lifetime parameters extracted from fitting curves of TRPL file.

|            | $A_1$ | $\tau_1$ (ns) | $A_2$ | $\tau_2$ (ns) | $\tau_{ave}$ (ns) | $y_0$ |
|------------|-------|---------------|-------|---------------|-------------------|-------|
| ZnO        | 0.940 | 1.40          | 0.060 | 36.0          | 22.90             | 0.010 |
| ZnO/BCP    | 0.955 | 1.35          | 0.045 | 36.0          | 20.65             | 0.008 |
| ZnO/BCP/Ag | 0.965 | 1.35          | 0.035 | 36.0          | 18.39             | 0.008 |
